# Supplementary material for: Environmentally Acquired Bacillus and Their Role in C. difficile Colonization Resistance
Source: MDPI journal article supplement (doi:10.3390/biomedicines10050930), 2022-04-19
Supplement: s1 [file s1]

### **Supplementary Video**

A filter-sterile supernatant of a Bv277 culture (grown for 18h in BHIB at 37°C) was added to a late-log culture (OD600 = ~1) of CD630 at a ratio of 1:10 (left tube). Incubation of CD630 was maintained at 37°C. After 28 minutes the treated culture showed almost complete lysis as compared to an untreated culture (right tube).
