# Supplementary material for: Environmentally Acquired Bacillus and Their Role in C. difficile Colonization Resistance
Source: MDPI journal article supplement (doi:10.3390/biomedicines10050930), 2022-04-19
Supplement: s1 [file s1]

## Supplementary Tables

**Supplementary Table S1: Human *Bacillus* Strains with Inhibitory Activity to *C. difficile***

| Name <sup>a</sup> | Surf <sup>b</sup> | Activity <sup>c</sup> |                   |       | HELM Composition <sup>d</sup> |          |           |               |
|-------------------|-------------------|-----------------------|-------------------|-------|-------------------------------|----------|-----------|---------------|
|                   |                   | Sup.                  | AmSO <sub>4</sub> | Lytic | Iturin                        | Fengycin | Surfactin | Chlorotetaine |
| Bv277             | +++               | 1:160                 | 1:1280            | +     | +                             | +        | +         | +             |
| Bv297             | +++               | 1:160                 | 1:1280            | +     | +                             | +        | +         | +             |
| Bv57              | ++                | 1:80                  | 1:640             | +     | +                             | +        | +         | -             |
| Bv137             | ++                | 1:80                  | 1:640             | +     | -                             | +        | +         | -             |
| Bv185             | ++                | 1:80                  | 1:320             | +     | -                             | +        | +         | -             |
| Bs83              | +                 | 1:20                  | 1:320             | +     | -                             | +        | +         | -             |
| Bs140             | +                 | 1:10                  | 1:80              | +     | -                             | +        | +         | -             |

<sup>a</sup> Strains isolated from human feces were either *B. subtilis* (Bs) or *B. velezensis* (Bv). Species determination was made initially by sequencing of the *gyrA* gene and then by complete genome sequencing.

<sup>b</sup> Biosurfactant activity of cell free supernatants determined using an oil-displacement assay (Youssef, N. H. *et al.* Comparison of methods to detect biosurfactant production by diverse microorganisms. *J Microbiol Methods* **56**, 339-347, doi:10.1016/j.mimet.2003.11.001 (2004)).

<sup>c</sup> Activity was determined using an *in vitro* microdilution assay measuring inhibition of growth of CD630 using two test samples, a) a filter-sterile cell-free supernatant (Sup.) from an overnight (18h) culture of the *Bacillus* strain, and b) an AmSO<sub>4</sub> (20%) precipitate of the cell-free supernatant at approx. 30X concentration. Lytic activity was determined as the ability to clarify a log-phase culture of CD630.

<sup>d</sup> The AmSO<sub>4</sub> precipitate was fractionated using SEC and the active fraction (determined using the *in vitro* microdilution assay) examined by RP-HPLC. Approximately 20 fractions were collected and identified by cross-referencing them to the known retention time of each of the four compounds shown in the table.

**Supplementary Table S2: MALDI-TOF Analysis of BV277 HELM RP-HPLC Active Fractions**

| Compounds                                                                          | m/z      | Ions detected             | Structure                                                                            |
|------------------------------------------------------------------------------------|----------|---------------------------|--------------------------------------------------------------------------------------|
| Chlorotetaine                                                                      |          |                           |                                                                                      |
| Chlorotetaine ( <sup>35</sup> Cl)                                                  | 288.088  | [M+Na], [M+K], [M-H+2xNa] | 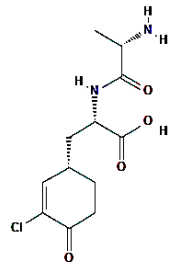  |
| Chlorotetaine ( <sup>37</sup> Cl)                                                  | 290.085  | [M+Na], [M+K], [M-H+2xNa] |                                                                                      |
| Hydroxychlorotetaine ( <sup>35</sup> Cl)                                           | 304.083  | [M+Na], [M+K]             |                                                                                      |
| Hydroxychlorotetaine ( <sup>37</sup> Cl)                                           | 306.080  | [M+Na], [M+K]             |                                                                                      |
| Iturins                                                                            |          |                           |                                                                                      |
| C <sub>12</sub> IturinA/C <sub>12</sub> Mycosubtilin/C <sub>11</sub> BacillomycinF | 1014.512 | [M+Na]                    |  |
| C <sub>14</sub> BacillomycinL                                                      | 1020.511 | [M+Na], [M-H+2xNa]        |                                                                                      |
| C <sub>13</sub> IturinA/C <sub>13</sub> Mycosubtilin/C <sub>12</sub> BacillomycinF | 1028.527 | [M+Na]                    |                                                                                      |
| C <sub>14</sub> BacillomycinD                                                      | 1030.532 | [M+K]                     |                                                                                      |
| C <sub>15</sub> BacillomycinL                                                      | 1034.527 | [M+H], [M+Na], [M+K]      |                                                                                      |
| C <sub>14</sub> IturinA/C <sub>14</sub> Mycosubtilin/C <sub>13</sub> BacillomycinF | 1042.543 | [M+H], [M+Na], [M+K]      |                                                                                      |
| C <sub>15</sub> BacillomycinD                                                      | 1044.547 | [M+K]                     |                                                                                      |
| C <sub>16</sub> BacillomycinL                                                      | 1048.542 | [M+H], [M-H+2xNa]         |                                                                                      |
| C <sub>15</sub> IturinA/C <sub>15</sub> Mycosubtilin/C <sub>14</sub> BacillomycinF | 1056.559 | [M+H], [M+Na], [M+K]      |                                                                                      |
| C <sub>15</sub> IturinB                                                            | 1057.543 | [M+H], [M+Na], [M+K]      |                                                                                      |
| C <sub>16</sub> BacillomycinD                                                      | 1058.563 | [M+K]                     |                                                                                      |
| C <sub>17</sub> BacillomycinL                                                      | 1062.558 | [M-H+2xNa]                |                                                                                      |
| C <sub>16</sub> IturinA/C <sub>16</sub> Mycosubtilin/C <sub>15</sub> BacillomycinF | 1070.574 | [M+Na], [M+K]             |                                                                                      |
| C <sub>17</sub> IturinA/C <sub>17</sub> Mycosubtilin/C <sub>16</sub> BacillomycinF | 1084.605 | [M+Na]                    |                                                                                      |

| Fengycins                                                                                    |          |                                       |  | 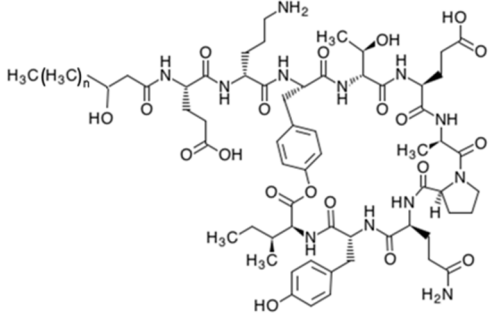 |
|----------------------------------------------------------------------------------------------|----------|---------------------------------------|--|-------------------------------------------------------------------------------------|
| C <sub>15</sub> FengycinA/C <sub>13</sub> FengycinB//Plipastatin B C <sub>13</sub>           | 1448.778 | [M+Na]                                |  |                                                                                     |
| C <sub>16</sub> FengycinA/C <sub>14</sub> FengycinB//Plipastatin A1                          | 1462.793 | [M+H], [M+Na]                         |  |                                                                                     |
| Fengycin B (C <sub>16</sub> /Ala-6)                                                          | 1462.900 | [M+H], [M+Na]                         |  |                                                                                     |
| C <sub>17</sub> FengycinA/C <sub>15</sub> FengycinB//Plipastatin A 2                         | 1476.809 | [M+H], [M+Na]                         |  |                                                                                     |
| Fengycin C (C <sub>17</sub> /Ala-6)                                                          | 1476.900 | [M+H], [M+Na]                         |  |                                                                                     |
| C <sub>18</sub> FengycinA/C <sub>16</sub> FengycinB//Plipastatin B 1                         | 1490.824 | [M+H], [M+Na]                         |  |                                                                                     |
| Fengycin D (C <sub>16</sub> /Val-6)                                                          | 1490.900 | [M+H], [M+Na]                         |  |                                                                                     |
| C <sub>19</sub> FengycinA/C <sub>17</sub> FengycinB//Plipastatin B 2                         | 1504.840 | [M+Na]                                |  |                                                                                     |
| Fengycin E (C <sub>17</sub> /Val-6)                                                          | 1504.900 | [M+Na]                                |  |                                                                                     |
| Surfactins                                                                                   |          |                                       |  |  |
| C <sub>12</sub> SurfactinA/C <sub>13</sub> SurfactinB/C <sub>12</sub> SurfactinC/Pumilacidin | 993.634  | [M+Na], [M-H+Na+K]                    |  |                                                                                     |
| C <sub>13</sub> SurfactinA/C <sub>14</sub> SurfactinB/C <sub>13</sub> SurfactinC/Pumilacidin | 1007.650 | [M+Na], [M+K], [M-H+2xNa], [M-H+Na+K] |  |                                                                                     |
| C <sub>12</sub> Surfactin (linearized)                                                       | 1011.600 | [M+Na], [M-H+2xNa]                    |  |                                                                                     |
| C <sub>14</sub> SurfactinA/C <sub>15</sub> SurfactinB/C <sub>14</sub> SurfactinC/Pumilacidin | 1021.665 | [M+Na], [M+K], [M-H+2xNa], [M-H+Na+K] |  |                                                                                     |
| C <sub>13</sub> Surfactin (linearized)                                                       | 1026.600 | [M+K]                                 |  |                                                                                     |
| C <sub>15</sub> SurfactinA/C <sub>16</sub> SurfactinB/C <sub>15</sub> SurfactinC/Pumilacidin | 1035.681 | [M+Na], [M+K], [M-H+2xNa], [M-H+Na+K] |  |                                                                                     |
| C <sub>14</sub> Surfactin (linearized)                                                       | 1040.600 | [M+K]                                 |  |                                                                                     |
| C <sub>16</sub> SurfactinA/C <sub>17</sub> SurfactinB/C <sub>16</sub> SurfactinC/Pumilacidin | 1049.696 | [M+H], [M+Na], [M+K]                  |  |                                                                                     |
| C <sub>17</sub> SurfactinA/C <sub>18</sub> SurfactinB/C <sub>17</sub> SurfactinC/Pumilacidin | 1063.712 | [M+K]                                 |  |                                                                                     |
