# Supplementary material for: Environmentally Acquired Bacillus and Their Role in C. difficile Colonization Resistance
Source: MDPI journal article supplement (doi:10.3390/biomedicines10050930), 2022-04-19
Supplement: s1 [file s1]

## Supplementary Methods

### Strains

CD630 (or 630) was isolated from a patient with pseudomembranous colitis during an outbreak of *C. difficile* infection (CDI)<sup>1</sup>. The strain is ribotype 012 and produces toxins A (*tcdA*<sup>+</sup>) and B (*tcdB*<sup>+</sup>). Ribotype 078 (SH11) and 027 (R2091) strains were obtained from Public Health England or B. Wren respectively.

### Construction of *srfAA* mutant

The genome of Bv277 (HELM<sup>+</sup>) was sequenced in its entirety revealing the four cistrons of the *srfA* operon. Primers (F: AAAAAGCTTCGGGGTTCGGGAAACTCATTTTC; R: TTTGAATTCGCATGCGCAGGGGTTCGTCAG) were used to amplify a 2007 bp internal segment of the *srfAA* cistron of Bv277. Restriction endonuclease sites incorporated in the PCR primers enabled direct cloning of the amplified DNA into pSGMU2, a plasmid able to replicate autonomously in *E. coli* but not *Bacillus*<sup>2</sup>. Protoplasts of Bv277 cells were made using lysozyme degradation in an isotonic solution as described elsewhere<sup>3</sup> and DNA of the recombinant plasmid introduced followed by two-step phased selection of chloramphenicol resistance (5 µg ml<sup>-1</sup>). Transformants would only arise if plasmid DNA had integrated at the *srfAA* cistron by virtue of homologous DNA between genome and plasmid. Integration by a Campbell-type recombination disrupts the *srfA* operon resulting in failure to transcribe all four cistrons.

### Analysis of toxins using ELISA

Toxins A and B were recovered from fecal or cecal samples and diluted 1:5 (w/v) in extraction buffer (PBS containing 2% (v/v) fetal calf serum, penicillin-streptomycin (Sigma P4333; 10ml/L) and Pierce protease inhibitor tablets (Thermo 88265). Samples were homogenized in extraction buffer and incubated for 2h at 4°C. The supernatant was harvested after centrifugation (12,000 g, 5 min.) and filtered (0.2 µm). Rabbit anti-toxin A and toxin B (in house reagents) were used to coat ELISA plates (1/6,000) and left overnight at RT. Subsequently, plates were blocked for 1h at 37°C with 2% BSA. Toxin extracted samples were incubated for 2h at RT. Replicate samples were used together with a negative control (toxin extract from a non-infected animal). Detection antibodies were mouse anti-toxin A and anti-toxin B (in house reagents; 1/1000) and were incubated for 1h at 30°C. HRP-conjugated anti-mouse IgG (Dako; 1/2000) was used as the detection antibody for 1h at RT. Reactions were developed using TMB substrate and stopped by 2M H<sub>2</sub>SO<sub>4</sub> and OD read at 450nm.

## References

1. Wust, J., Sullivan, N. M., Hardegger, U. & Wilkins, T. D. Investigation of an outbreak of antibiotic-associated colitis by various typing methods. *J Clin Microbiol* **16**, 1096-1101, doi:10.1128/JCM.16.6.1096-1101.1982 (1982).
2. Fort, P. & Errington, J. Nucleotide sequence and complementation analysis of a polycistronic sporulation operon, *spoVA*, in *Bacillus subtilis*. *J Gen Microbiol* **131**, 1091-1105, doi:10.1099/00221287-131-5-1091 (1985).
- 3, Vehmaanpera, J. Transformation of *Bacillus amyloliquefaciens* protoplasts with plasmid DNA. *FEMS Microbiology Letters* **49**, 101-105 (1988).
