# Supplementary material for: Environmentally Acquired Bacillus and Their Role in C. difficile Colonization Resistance
Source: Biomedicines. 2022 Apr 19;10(5):930. doi: 10.3390/biomedicines10050930 (PMC9138776; doi:10.3390/biomedicines10050930)
Supplement: Supplementary file 1 [file biomedicines-10-00930-s001.zip]

Archive with 5 entries (5 files):
- Supp Video.mp4
- Supplementary Figures.pptx
- Supplementary Methods.pdf
- Supplementary Tables.pdf
- Supplementary Video.pdf
